# Supplementary material for: Responses of tidal duration asymmetry to morphological changes in Lingding Bay of the Pearl River Estuary
Source: Frontiers journal article supplement (doi:10.3389/fmars.2022.983182), 2022-09-02
Supplement: Table_1.DOCX [file Table_1.DOCX]

Supporting information


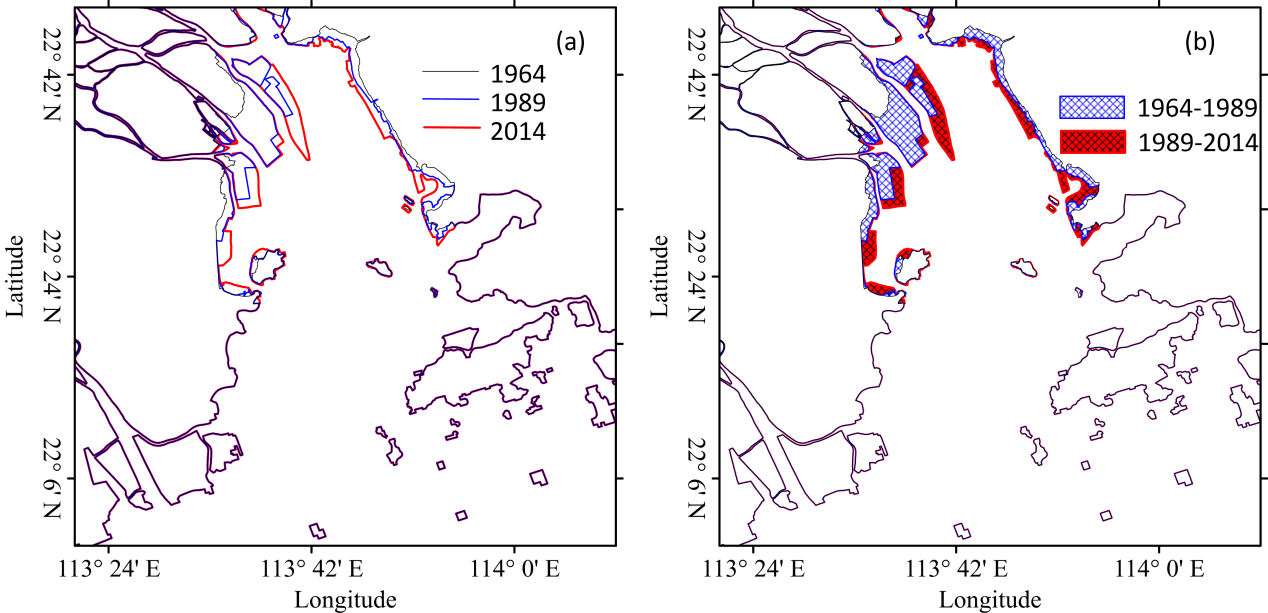


Figure S1. Changes in coastlines (a) and the reclaimed areas (b) of LDB from 1964 to 2014.


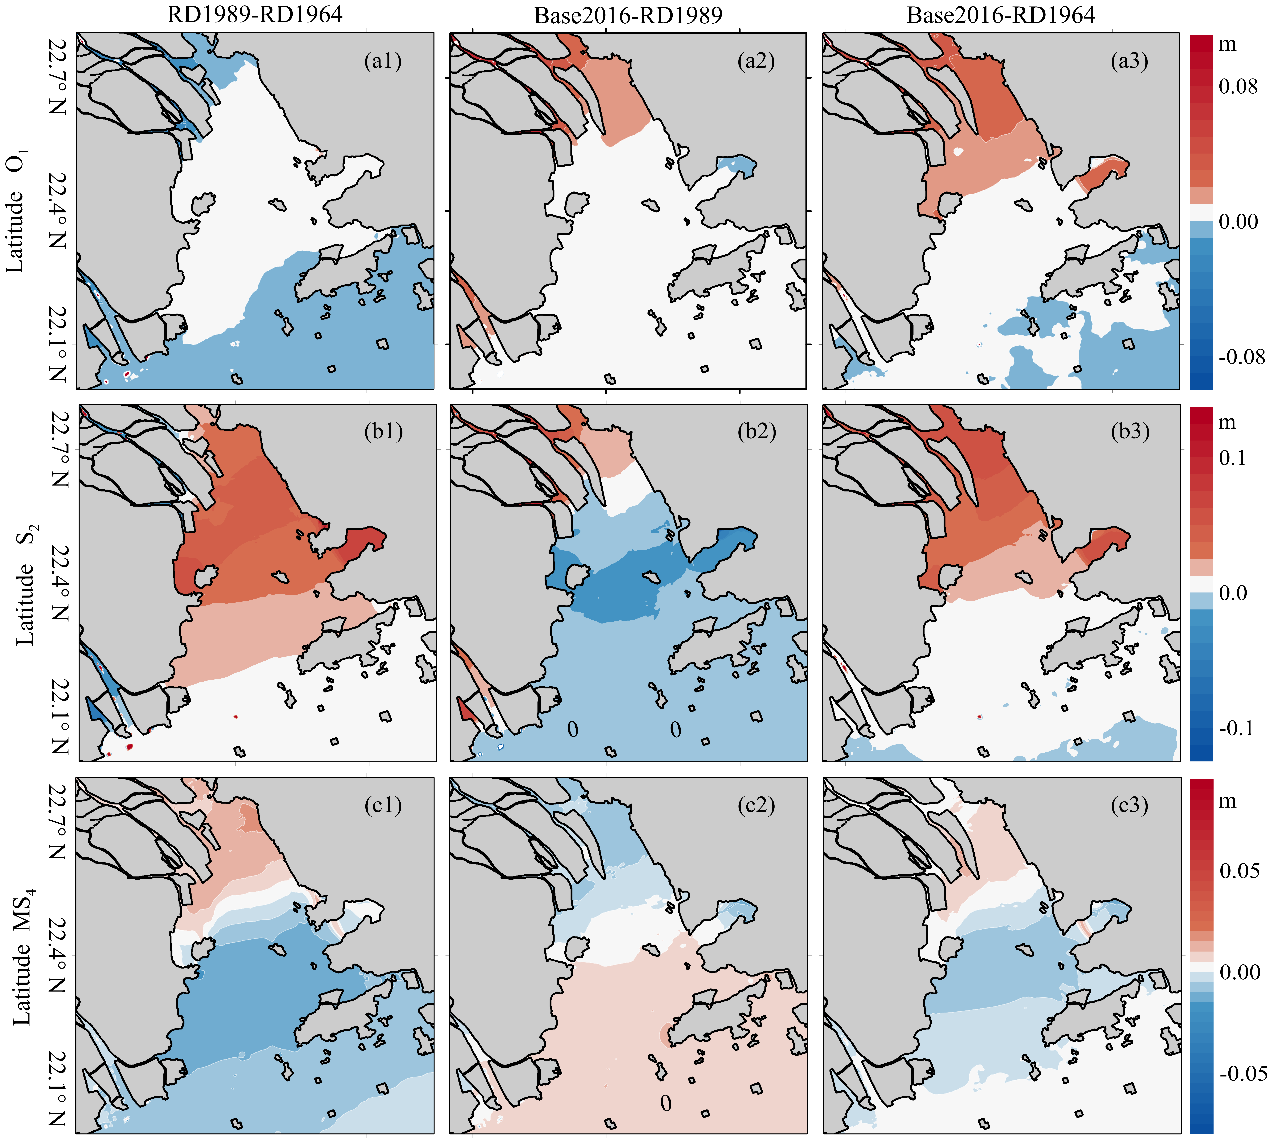


Figure S2. Contour map of the changes in O1 (a1-a3), S2 (b1-b3), and MS4 (c1-c3) amplitudes, where the numbers (1, 2, 3) represent the periods of 1964-1989, 1989-2016, 1964-2016, respectively.


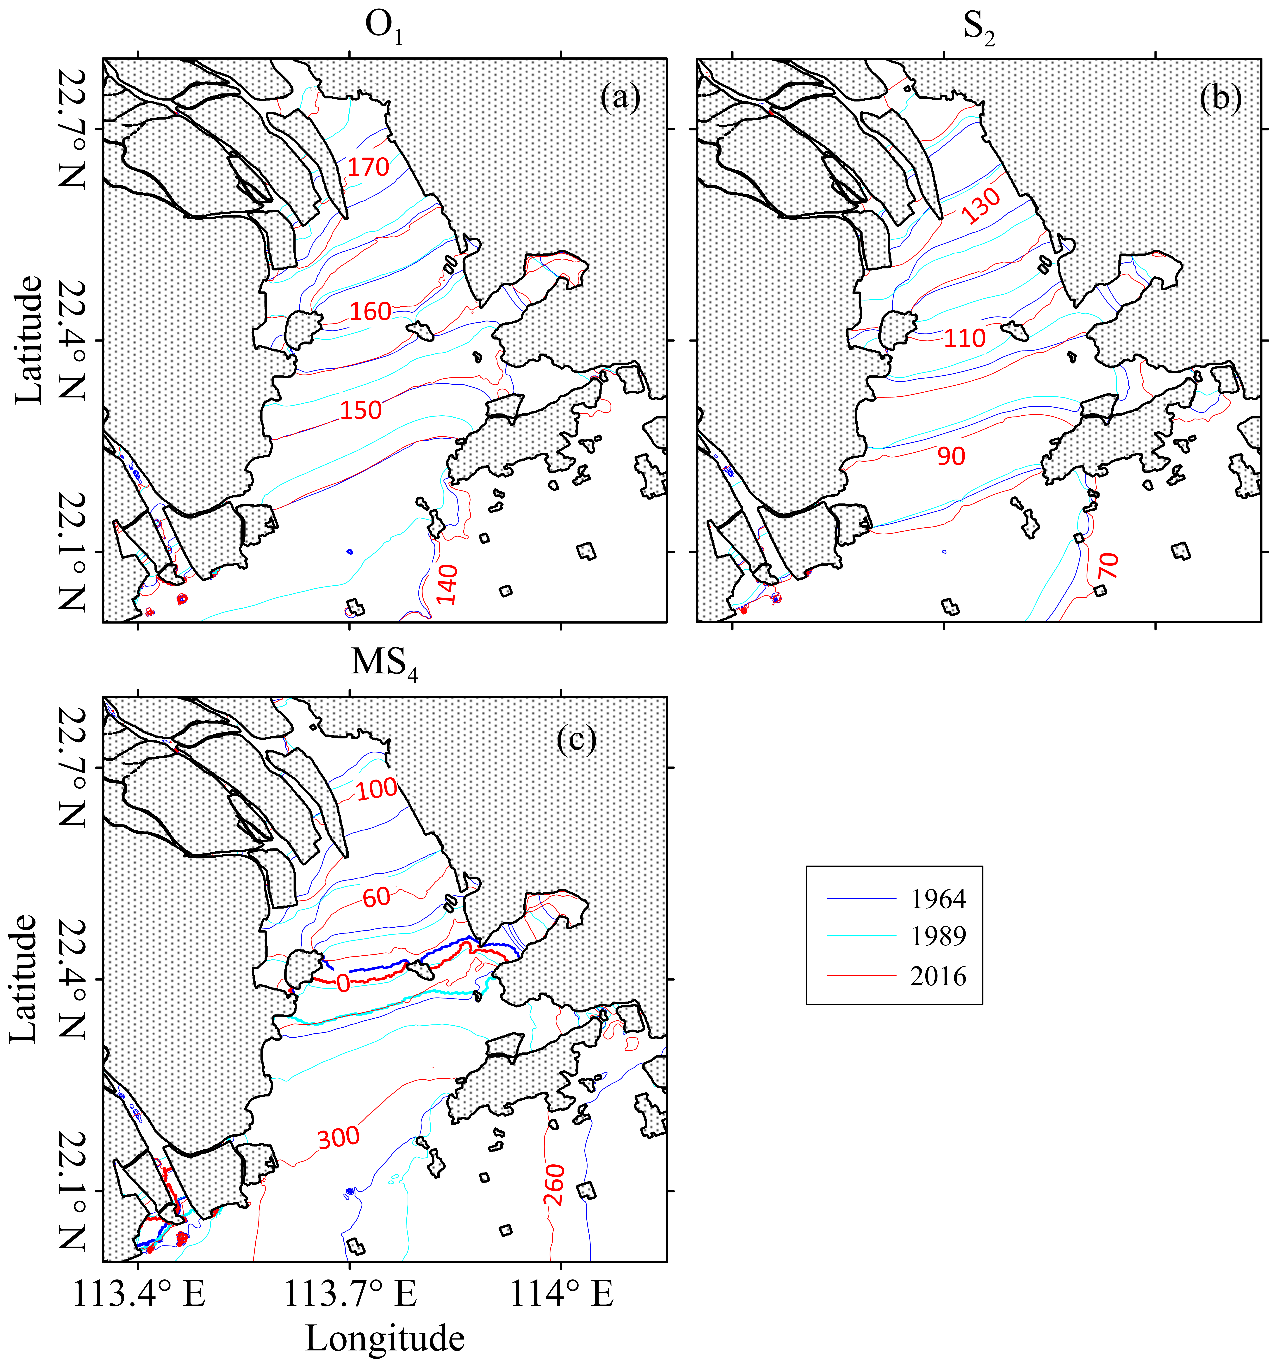


Figure S3. Contour map of the changes in O1 (a1-a3), S2 (b1-b3), and MS4 (c1-c3) tidal phases, where the numbers (1, 2, 3) represent the periods of 1964-1989, 1989-2016, 1964-2016, respectively.
